# Supplementary material for: Indigenous Australian household structure: a simple data collection tool and implications for close contact transmission of communicable diseases
Source: PeerJ. 2017 Oct 26;5:e3958. doi: 10.7717/peerj.3958 (PMC5660877; doi:10.7717/peerj.3958)
Supplement: Supplemental Information 3 — The ethics review board has recently approved the provision of the de-identified raw dataset to be associated with the publication and for it to be made openly available. [file peerj-05-3958-s003.xlsx]

## Sheet: ABC_CLEANSED_adjusted
idnum	shire	rem_urb	sex	age_yrs	overall_no	all_adult	all_child	all_baby	all_male	all_female	rm1_no	rm1_female	rm1_male	rm1_childfemale	rm1_childmale	rm1_babyfemale	rm1_babymale	rm2_no	rm2_female	rm2_male	rm2_childfemale	rm2_childmale	rm2_babyfemale	rm2_babymale	rm3_no	rm3_female	rm3_male	rm3_childfemale	rm3_childmale	rm3_babyfemale	rm3_babymale	rm4_no	rm4_female	rm4_male	rm4_childfemale	rm4_childmale	rm4_babyfemale	rm4_babymale	rm5_no	rm5_female	rm5_male	rm5_childfemale	rm5_childmale	rm5_babyfemale	rm5_babymale	house_c	No of Rooms in a house hold	Average no of ppl in a room
1	East Arnhem	ABC remote	female	27	7	4	2	1	4	3	4	1	1	0	1	0	1	3	1	1	1	0	0	0	0	0	0	0	0	0	0	0	0	0	0	0	0	0	0	0	0	0	0	0	0	7	2	3.5
3	Darwin	ABC urban	female	27	2	2	0	0	0	2	1	1	0	0	0	0	0	1	1	0	0	0	0	0	0	0	0	0	0	0	0	0	0	0	0	0	0	0	0	0	0	0	0	0	0	2	2	1
11	East Arnhem	ABC remote	male	27	7	7	0	0	5	2	1	0	1	0	0	0	0	2	1	1	0	0	0	0	2	1	1	0	0	0	0	2	0	2	0	0	0	0	0	0	0	0	0	0	0	7	4	1.75
16	East Arnhem	ABC remote	male	27	8	4	4	0	4	4	2	0	0	2	0	0	0	4	1	1	0	2	0	0	2	1	1	0	0	0	0	0	0	0	0	0	0	0	0	0	0	0	0	0	0	8	3	2.67
19	Tiwi Islands	ABC remote	male	27	4	2	2	0	2	2	2	0	1	1	0	0	0	2	1	0	0	1	0	0	0	0	0	0	0	0	0	0	0	0	0	0	0	0	0	0	0	0	0	0	0	4	2	2
21	Tiwi Islands	ABC remote	male	27	6	5	1	0	2	4	1	0	1	0	0	0	0	1	1	0	0	0	0	0	1	1	0	0	0	0	0	3	2	0	0	1	0	0	0	0	0	0	0	0	0	6	4	1.5
22	Tiwi Islands	ABC remote	female	27	5	3	2	0	1	4	4	1	1	2	0	0	0	1	1	0	0	0	0	0	0	0	0	0	0	0	0	0	0	0	0	0	0	0	0	0	0	0	0	0	0	5	2	2.5
25	East Arnhem	ABC remote	male	26	9	4	5	0	5	4	2	1	1	0	0	0	0	6	1	1	2	2	0	0	1	0	0	0	1	0	0	0	0	0	0	0	0	0	0	0	0	0	0	0	0	9	3	3
28	Victoria Daly	ABC remote	female	27	10	5	2	3	3	7	2	2	0	0	0	0	0	5	1	0	2	0	1	1	3	1	1	0	0	0	1	0	0	0	0	0	0	0	0	0	0	0	0	0	0	10	3	3.33
29	East Arnhem	ABC urban	female	27	11	5	4	2	5	6	3	1	0	0	0	1	1	6	0	2	2	2	0	0	2	1	1	0	0	0	0	0	0	0	0	0	0	0	0	0	0	0	0	0	0	11	3	3.67
33	Katherine	ABC remote	male	27	3	3	0	0	3	0	1	0	1	0	0	0	0	1	0	1	0	0	0	0	1	0	1	0	0	0	0	0	0	0	0	0	0	0	0	0	0	0	0	0	0	3	3	1
34	Darwin	ABC urban	male	26	6	3	2	1	4	2	4	1	1	1	0	0	1	2	0	1	0	1	0	0	0	0	0	0	0	0	0	0	0	0	0	0	0	0	0	0	0	0	0	0	0	6	2	3
36	Katherine	ABC remote	female	27	6	4	2	0	4	2	4	1	1	0	2	0	0	2	1	1	0	0	0	0	0	0	0	0	0	0	0	0	0	0	0	0	0	0	0	0	0	0	0	0	0	6	2	3
38	Victoria Daly	ABC remote	male	26	9	4	5	0	4	5	3	1	1	0	1	0	0	4	2	0	0	2	0	0	2	0	0	2	0	0	0	0	0	0	0	0	0	0	0	0	0	0	0	0	0	9	3	3
41	East Arnhem	ABC remote	female	27	7	5	1	1	3	4	4	1	1	1	0	0	1	2	2	0	0	0	0	0	1	0	1	0	0	0	0	0	0	0	0	0	0	0	0	0	0	0	0	0	0	7	3	2.33
45	Victoria Daly	ABC remote	female	27	12	7	5	0	4	8	4	1	1	1	1	0	0	6	3	0	2	1	0	0	2	1	1	0	0	0	0	0	0	0	0	0	0	0	0	0	0	0	0	0	0	12	3	4
47	Tiwi Islands	ABC remote	female	27	5	5	0	0	3	2	2	1	1	0	0	0	0	1	0	1	0	0	0	0	2	1	1	0	0	0	0	0	0	0	0	0	0	0	0	0	0	0	0	0	0	5	3	1.67
49	Darwin	ABC urban	female	26	4	4	0	0	2	2	2	1	1	0	0	0	0	2	1	1	0	0	0	0	0	0	0	0	0	0	0	0	0	0	0	0	0	0	0	0	0	0	0	0	0	4	2	2
50	East Arnhem	ABC remote	female	26	9	6	2	1	6	3	3	1	1	0	0	0	1	2	0	0	0	2	0	0	2	1	1	0	0	0	0	2	1	1	0	0	0	0	0	0	0	0	0	0	0	9	4	2.25
51	Katherine	ABC remote	male	27	3	3	0	0	2	1	2	1	1	0	0	0	0	1	0	1	0	0	0	0	0	0	0	0	0	0	0	0	0	0	0	0	0	0	0	0	0	0	0	0	0	3	2	1.5
52	Palmerston	ABC urban	female	26	2	2	0	0	1	1	2	1	1	0	0	0	0	0	0	0	0	0	0	0	0	0	0	0	0	0	0	0	0	0	0	0	0	0	0	0	0	0	0	0	0	2	1	2
56	Victoria Daly	ABC remote	female	27	11	6	5	0	4	7	5	1	1	1	2	0	0	3	1	1	1	0	0	0	3	2	0	1	0	0	0	0	0	0	0	0	0	0	0	0	0	0	0	0	0	11	3	3.67
57	Victoria Daly	ABC remote	female	26	9	5	3	1	5	4	4	1	1	0	1	0	1	3	1	1	0	1	0	0	2	1	0	1	0	0	0	0	0	0	0	0	0	0	0	0	0	0	0	0	0	9	3	3
58	Tiwi Islands	ABC remote	female	27	4	3	0	1	2	2	3	1	1	0	0	0	1	1	1	0	0	0	0	0	0	0	0	0	0	0	0	0	0	0	0	0	0	0	0	0	0	0	0	0	0	4	2	2
59	East Arnhem	ABC remote	male	26	17	8	9	0	11	6	1	0	1	0	0	0	0	10	2	2	0	6	0	0	5	1	2	2	0	0	0	1	0	0	1	0	0	0	0	0	0	0	0	0	0	17	4	4.25
60	Victoria Daly	ABC remote	male	26	1	1	0	0	1	0	1	0	1	0	0	0	0	0	0	0	0	0	0	0	0	0	0	0	0	0	0	0	0	0	0	0	0	0	0	0	0	0	0	0	0	1	1	1
62	East Arnhem	ABC remote	female	27	10	7	3	0	4	6	4	1	1	2	0	0	0	1	1	0	0	0	0	0	2	1	1	0	0	0	0	3	1	1	0	1	0	0	0	0	0	0	0	0	0	10	4	2.5
63	Victoria Daly	ABC remote	female	26	12	8	4	0	4	8	1	1	0	0	0	0	0	3	3	0	0	0	0	0	4	1	1	2	0	0	0	4	1	1	0	2	0	0	0	0	0	0	0	0	0	12	4	3
65	MacDonnell	ABC urban	male	27	11	5	3	3	3	8	1	0	1	0	0	0	0	3	1	1	0	0	1	0	4	2	0	0	0	1	1	3	0	0	3	0	0	0	0	0	0	0	0	0	0	11	4	2.75
66	East Arnhem	ABC remote	male	26	3	3	0	0	2	1	1	0	1	0	0	0	0	2	1	1	0	0	0	0	0	0	0	0	0	0	0	0	0	0	0	0	0	0	0	0	0	0	0	0	0	3	2	1.5
69	East Arnhem	ABC remote	male	26	7	6	1	0	5	2	2	0	2	0	0	0	0	2	1	1	0	0	0	0	1	0	1	0	0	0	0	2	1	0	0	1	0	0	0	0	0	0	0	0	0	7	4	1.75
70	Darwin	ABC urban	female	26	3	3	0	0	2	1	1	1	0	0	0	0	0	1	0	1	0	0	0	0	1	0	1	0	0	0	0	0	0	0	0	0	0	0	0	0	0	0	0	0	0	3	3	1
71	Victoria Daly	ABC remote	female	27	4	2	2	0	2	2	4	1	1	1	1	0	0	0	0	0	0	0	0	0	0	0	0	0	0	0	0	0	0	0	0	0	0	0	0	0	0	0	0	0	0	4	1	4
73	Victoria Daly	ABC remote	male	27	4	2	2	0	2	2	4	1	1	1	1	0	0	0	0	0	0	0	0	0	0	0	0	0	0	0	0	0	0	0	0	0	0	0	0	0	0	0	0	0	0	4	1	4
74	Darwin	ABC urban	male	26	6	6	0	0	3	3	1	0	1	0	0	0	0	4	3	1	0	0	0	0	1	0	1	0	0	0	0	0	0	0	0	0	0	0	0	0	0	0	0	0	0	6	3	2
77	East Arnhem	ABC remote	female	27	7	5	1	1	3	4	4	1	1	1	0	0	1	2	1	1	0	0	0	0	1	1	0	0	0	0	0	0	0	0	0	0	0	0	0	0	0	0	0	0	0	7	3	2.33
79	Darwin	ABC urban	male	26	4	2	0	2	2	2	4	1	1	0	0	1	1	0	0	0	0	0	0	0	0	0	0	0	0	0	0	0	0	0	0	0	0	0	0	0	0	0	0	0	0	4	1	4
80	East Arnhem	ABC remote	female	26	9	7	2	0	2	7	6	3	1	2	0	0	0	3	2	1	0	0	0	0	0	0	0	0	0	0	0	0	0	0	0	0	0	0	0	0	0	0	0	0	0	9	2	4.5
84	Victoria Daly	ABC remote	female	26	7	3	4	0	3	4	2	1	0	0	1	0	0	5	1	1	2	1	0	0	0	0	0	0	0	0	0	0	0	0	0	0	0	0	0	0	0	0	0	0	0	7	2	3.5
86	East Arnhem	ABC remote	male	27	11	7	2	2	6	5	2	1	1	0	0	0	0	4	1	1	1	0	1	0	3	0	1	0	1	0	1	2	1	1	0	0	0	0	0	0	0	0	0	0	0	11	4	2.75
88	Victoria Daly	ABC remote	male	27	3	3	0	0	1	2	1	0	1	0	0	0	0	0	0	0	0	0	0	0	2	2	0	0	0	0	0	0	0	0	0	0	0	0	0	0	0	0	0	0	0	3	2	1.5
91	Victoria Daly	ABC remote	male	26	9	7	1	1	6	3	3	0	1	0	1	0	1	2	1	1	0	0	0	0	2	0	2	0	0	0	0	2	2	0	0	0	0	0	0	0	0	0	0	0	0	9	4	2.25
95	Victoria Daly	ABC remote	male	26	8	6	0	2	6	2	1	0	1	0	0	0	0	4	1	1	0	0	1	1	1	0	1	0	0	0	0	1	0	1	0	0	0	0	1	0	1	0	0	0	0	8	5	1.6
97	East Arnhem	ABC remote	male	26	4	4	0	0	3	1	2	0	2	0	0	0	0	2	1	1	0	0	0	0	0	0	0	0	0	0	0	0	0	0	0	0	0	0	0	0	0	0	0	0	0	4	2	2
98	Victoria Daly	ABC remote	female	27	16	6	10	0	2	14	5	2	0	3	0	0	0	2	1	1	0	0	0	0	4	1	0	3	0	0	0	5	1	0	3	1	0	0	0	0	0	0	0	0	0	16	4	4
105	Victoria Daly	ABC remote	female	26	12	8	3	1	5	7	4	3	0	1	0	0	0	3	1	1	0	0	1	0	4	1	1	0	2	0	0	1	0	1	0	0	0	0	0	0	0	0	0	0	0	12	4	3
108	Victoria Daly	ABC remote	female	26	10	5	4	1	5	5	6	1	0	2	2	0	1	4	2	2	0	0	0	0	0	0	0	0	0	0	0	0	0	0	0	0	0	0	0	0	0	0	0	0	0	10	2	5
111	Litchfield	ABC urban	male	26	2	2	0	0	2	0	1	0	1	0	0	0	0	1	0	1	0	0	0	0	0	0	0	0	0	0	0	0	0	0	0	0	0	0	0	0	0	0	0	0	0	2	2	1
112	Darwin	ABC urban	female	26	1	1	0	0	0	1	1	1	0	0	0	0	0	0	0	0	0	0	0	0	0	0	0	0	0	0	0	0	0	0	0	0	0	0	0	0	0	0	0	0	0	1	1	1
117	East Arnhem	ABC remote	male	26	14	4	8	2	5	9	2	0	2	0	0	0	0	6	1	0	2	1	2	0	6	1	0	3	2	0	0	0	0	0	0	0	0	0	0	0	0	0	0	0	0	14	3	4.67
118	Darwin	ABC urban	female	26	2	2	0	0	0	2	1	1	0	0	0	0	0	1	1	0	0	0	0	0	0	0	0	0	0	0	0	0	0	0	0	0	0	0	0	0	0	0	0	0	0	2	2	1
120	Katherine	ABC urban	male	27	4	3	1	0	1	3	3	1	1	1	0	0	0	1	1	0	0	0	0	0	0	0	0	0	0	0	0	0	0	0	0	0	0	0	0	0	0	0	0	0	0	4	2	2
122	Victoria Daly	ABC remote	male	26	21	8	9	4	7	14	4	1	1	2	0	0	0	6	2	0	1	2	1	0	7	0	0	4	0	1	2	4	2	2	0	0	0	0	0	0	0	0	0	0	0	21	4	5.25
128	Victoria Daly	ABC remote	male	26	8	7	1	0	4	4	2	1	1	0	0	0	0	3	1	1	1	0	0	0	1	0	1	0	0	0	0	2	1	1	0	0	0	0	0	0	0	0	0	0	0	8	4	2
130	East Arnhem	ABC remote	female	26	10	4	5	1	6	4	5	1	1	1	1	0	1	2	0	2	0	0	0	0	3	0	0	1	2	0	0	0	0	0	0	0	0	0	0	0	0	0	0	0	0	10	3	3.33
131	East Arnhem	ABC remote	male	27	5	4	1	0	2	3	3	1	1	0	1	0	0	2	2	0	0	0	0	0	0	0	0	0	0	0	0	0	0	0	0	0	0	0	0	0	0	0	0	0	0	5	2	2.5
132	East Arnhem	ABC remote	male	27	7	4	3	0	3	4	2	1	1	0	0	0	0	5	2	0	1	2	0	0	0	0	0	0	0	0	0	0	0	0	0	0	0	0	0	0	0	0	0	0	0	7	2	3.5
136	Tiwi Islands	ABC remote	female	26	5	3	1	1	4	1	3	1	1	0	0	0	1	2	0	1	0	1	0	0	0	0	0	0	0	0	0	0	0	0	0	0	0	0	0	0	0	0	0	0	0	5	2	2.5
140	Katherine	ABC remote	female	27	17	6	9	2	10	7	6	1	0	1	3	0	1	4	1	1	0	1	0	1	4	2	0	1	1	0	0	3	1	0	0	2	0	0	0	0	0	0	0	0	0	17	4	4.25
142	East Arnhem	ABC urban	female	27	4	2	2	0	2	2	4	1	1	1	1	0	0	0	0	0	0	0	0	0	0	0	0	0	0	0	0	0	0	0	0	0	0	0	0	0	0	0	0	0	0	4	1	4
150	East Arnhem	ABC remote	female	26	9	6	3	0	4	5	3	2	0	1	0	0	0	2	1	1	0	0	0	0	4	1	1	0	2	0	0	0	0	0	0	0	0	0	0	0	0	0	0	0	0	9	3	3
151	East Arnhem	ABC remote	male	26	17	10	5	2	8	9	4	1	1	0	1	1	0	1	1	0	0	0	0	0	4	0	2	0	1	1	0	3	3	0	0	0	0	0	5	0	2	2	1	0	0	17	5	3.4
152	East Arnhem	ABC remote	male	26	5	3	1	1	4	1	4	1	1	0	1	0	1	1	0	1	0	0	0	0	0	0	0	0	0	0	0	0	0	0	0	0	0	0	0	0	0	0	0	0	0	5	2	2.5
156	Katherine	ABC remote	male	27	7	5	1	1	2	5	2	1	1	0	0	0	0	4	2	0	1	0	1	0	1	0	1	0	0	0	0	0	0	0	0	0	0	0	0	0	0	0	0	0	0	7	3	2.33
159	Victoria Daly	ABC remote	male	26	13	7	5	1	8	5	3	1	1	0	0	0	1	4	1	1	0	2	0	0	4	1	1	2	0	0	0	2	0	1	0	1	0	0	0	0	0	0	0	0	0	13	4	3.25
162	Victoria Daly	ABC remote	male	26	14	7	4	3	5	9	5	1	2	0	0	1	1	2	2	0	0	0	0	0	7	2	0	2	2	1	0	0	0	0	0	0	0	0	0	0	0	0	0	0	0	14	3	4.67
163	East Arnhem	ABC remote	male	26	3	3	0	0	2	1	1	0	1	0	0	0	0	1	0	1	0	0	0	0	1	1	0	0	0	0	0	0	0	0	0	0	0	0	0	0	0	0	0	0	0	3	3	1
164	Victoria Daly	ABC remote	female	26	10	3	6	1	6	4	2	1	0	0	0	0	1	8	1	1	2	4	0	0	0	0	0	0	0	0	0	0	0	0	0	0	0	0	0	0	0	0	0	0	0	10	2	5
165	East Arnhem	ABC remote	male	26	9	8	1	0	7	2	4	0	4	0	0	0	0	2	1	1	0	0	0	0	3	1	1	0	1	0	0	0	0	0	0	0	0	0	0	0	0	0	0	0	0	9	3	3
167	East Arnhem	ABC remote	male	26	4	4	0	0	4	0	1	0	1	0	0	0	0	1	0	1	0	0	0	0	1	0	1	0	0	0	0	1	0	1	0	0	0	0	0	0	0	0	0	0	0	4	4	1
176	East Arnhem	ABC remote	male	26	7	6	1	0	7	0	1	0	1	0	0	0	0	1	0	1	0	0	0	0	2	0	2	0	0	0	0	1	0	1	0	0	0	0	2	0	1	0	1	0	0	7	5	1.4
177	Victoria Daly	ABC remote	female	26	12	6	4	2	6	6	5	1	1	1	1	0	1	2	1	1	0	0	0	0	1	0	1	0	0	0	0	4	1	0	1	1	1	0	0	0	0	0	0	0	0	12	4	3
180	East Arnhem	ABC remote	male	26	6	5	1	0	4	2	2	1	1	0	0	0	0	2	0	1	0	1	0	0	1	0	1	0	0	0	0	1	1	0	0	0	0	0	0	0	0	0	0	0	0	6	4	1.5
181	East Arnhem	ABC remote	female	26	14	6	8	0	3	11	3	1	0	1	1	0	0	5	2	0	3	0	0	0	2	0	2	0	0	0	0	4	1	0	3	0	0	0	0	0	0	0	0	0	0	14	4	3.5
182	East Arnhem	ABC remote	female	26	9	8	0	1	5	4	2	2	0	0	0	0	0	3	0	3	0	0	0	0	2	1	1	0	0	0	0	2	1	0	0	0	0	1	0	0	0	0	0	0	0	9	4	2.25
187	East Arnhem	ABC remote	female	26	12	7	4	1	3	9	6	2	0	2	1	1	0	2	1	1	0	0	0	0	2	1	0	1	0	0	0	2	1	1	0	0	0	0	0	0	0	0	0	0	0	12	4	3
191	MacDonnell	ABC urban	male	27	6	5	1	0	3	3	3	1	1	1	0	0	0	2	0	2	0	0	0	0	1	1	0	0	0	0	0	0	0	0	0	0	0	0	0	0	0	0	0	0	0	6	3	2
194	Victoria Daly	ABC remote	male	26	10	6	4	0	4	6	5	1	1	1	2	0	0	2	2	0	0	0	0	0	3	1	1	1	0	0	0	0	0	0	0	0	0	0	0	0	0	0	0	0	0	10	3	3.33
195	Tiwi Islands	ABC remote	male	26	4	2	2	0	3	1	4	1	1	0	2	0	0	0	0	0	0	0	0	0	0	0	0	0	0	0	0	0	0	0	0	0	0	0	0	0	0	0	0	0	0	4	1	4
196	East Arnhem	ABC remote	female	26	9	6	1	2	5	4	2	1	1	0	0	0	0	3	0	0	1	0	0	2	4	2	2	0	0	0	0	0	0	0	0	0	0	0	0	0	0	0	0	0	0	9	3	3
199	Victoria Daly	ABC remote	male	27	3	3	0	0	3	0	1	0	1	0	0	0	0	1	0	1	0	0	0	0	1	0	1	0	0	0	0	0	0	0	0	0	0	0	0	0	0	0	0	0	0	3	3	1
204	East Arnhem	ABC remote	male	26	10	7	3	0	2	8	2	1	1	0	0	0	0	2	0	2	0	0	0	0	2	0	0	2	0	0	0	2	1	0	1	0	0	0	2	1	1	0	0	0	0	10	5	2
205	Victoria Daly	ABC remote	male	26	2	2	0	0	1	1	2	1	1	0	0	0	0	0	0	0	0	0	0	0	0	0	0	0	0	0	0	0	0	0	0	0	0	0	0	0	0	0	0	0	0	2	1	2
207	East Arnhem	ABC remote	male	27	11	9	1	1	7	4	3	1	1	0	0	0	1	3	0	3	0	0	0	0	2	1	1	0	0	0	0	3	1	1	1	0	0	0	0	0	0	0	0	0	0	11	4	2.75
208	East Arnhem	ABC remote	female	26	8	6	0	2	5	3	4	1	1	0	0	2	0	3	0	3	0	0	0	0	1	0	1	0	0	0	0	0	0	0	0	0	0	0	0	0	0	0	0	0	0	8	3	2.67
211	Victoria Daly	ABC remote	female	26	7	5	0	2	4	3	4	1	1	0	0	1	1	2	1	1	0	0	0	0	1	0	1	0	0	0	0	0	0	0	0	0	0	0	0	0	0	0	0	0	0	7	3	2.33
213	East Arnhem	ABC remote	female	27	4	3	1	0	2	2	1	1	0	0	0	0	0	3	1	1	0	1	0	0	0	0	0	0	0	0	0	0	0	0	0	0	0	0	0	0	0	0	0	0	0	4	2	2
222	Palmerston	ABC urban	male	26	6	3	3	0	4	2	1	0	1	0	0	0	0	4	1	0	1	2	0	0	1	0	1	0	0	0	0	0	0	0	0	0	0	0	0	0	0	0	0	0	0	6	3	2
223	Litchfield	ABC urban	female	26	7	3	2	2	3	4	3	1	0	0	0	1	1	2	0	0	1	1	0	0	2	1	1	0	0	0	0	0	0	0	0	0	0	0	0	0	0	0	0	0	0	7	3	2.33
224	Victoria Daly	ABC remote	male	26	3	2	0	1	1	2	3	1	1	0	0	1	0	0	0	0	0	0	0	0	0	0	0	0	0	0	0	0	0	0	0	0	0	0	0	0	0	0	0	0	0	3	1	3
226	East Arnhem	ABC remote	female	26	5	5	0	0	3	2	2	2	0	0	0	0	0	1	0	1	0	0	0	0	1	0	1	0	0	0	0	1	0	1	0	0	0	0	0	0	0	0	0	0	0	5	4	1.25
229	East Arnhem	ABC remote	male	27	17	7	2	8	9	8	3	0	1	0	0	1	1	3	0	1	2	0	0	0	6	1	1	0	0	2	2	5	1	2	0	0	1	1	0	0	0	0	0	0	0	17	4	4.25
230	Tiwi Islands	ABC remote	female	26	5	5	0	0	2	3	2	1	1	0	0	0	0	1	1	0	0	0	0	0	2	1	1	0	0	0	0	0	0	0	0	0	0	0	0	0	0	0	0	0	0	5	3	1.67
235	Katherine	ABC remote	female	26	5	5	0	0	3	2	1	1	0	0	0	0	0	1	0	1	0	0	0	0	1	0	1	0	0	0	0	2	1	1	0	0	0	0	0	0	0	0	0	0	0	5	4	1.25
240	Victoria Daly	ABC remote	female	25	9	7	2	0	6	3	3	1	1	0	1	0	0	2	1	1	0	0	0	0	1	0	1	0	0	0	0	3	1	1	0	1	0	0	0	0	0	0	0	0	0	9	4	2.25
241	Victoria Daly	ABC remote	female	25	4	2	2	0	1	3	4	1	1	2	0	0	0	0	0	0	0	0	0	0	0	0	0	0	0	0	0	0	0	0	0	0	0	0	0	0	0	0	0	0	0	4	1	4
242	East Arnhem	ABC remote	male	25	6	5	1	0	2	4	6	3	2	1	0	0	0	0	0	0	0	0	0	0	0	0	0	0	0	0	0	0	0	0	0	0	0	0	0	0	0	0	0	0	0	6	1	6
243	Victoria Daly	ABC remote	female	26	10	5	3	2	4	6	3	1	0	1	0	1	0	5	1	1	1	1	0	1	2	1	1	0	0	0	0	0	0	0	0	0	0	0	0	0	0	0	0	0	0	10	3	3.33
244	Palmerston	ABC urban	male	25	2	2	0	0	1	1	2	1	1	0	0	0	0	0	0	0	0	0	0	0	0	0	0	0	0	0	0	0	0	0	0	0	0	0	0	0	0	0	0	0	0	2	1	2
249	Palmerston	ABC urban	male	26	6	2	2	2	5	1	6	1	1	0	2	0	2	0	0	0	0	0	0	0	0	0	0	0	0	0	0	0	0	0	0	0	0	0	0	0	0	0	0	0	0	6	1	6
251	Tiwi Islands	ABC remote	female	26	8	6	1	1	6	2	4	1	1	0	1	0	1	2	1	1	0	0	0	0	2	0	2	0	0	0	0	0	0	0	0	0	0	0	0	0	0	0	0	0	0	8	3	2.67
254	East Arnhem	ABC remote	male	25	6	4	2	0	2	4	2	0	2	0	0	0	0	4	2	0	2	0	0	0	0	0	0	0	0	0	0	0	0	0	0	0	0	0	0	0	0	0	0	0	0	6	2	3
255	East Arnhem	ABC remote	male	25	1	1	0	0	1	0	1	0	1	0	0	0	0	0	0	0	0	0	0	0	0	0	0	0	0	0	0	0	0	0	0	0	0	0	0	0	0	0	0	0	0	1	1	1
258	East Arnhem	ABC remote	female	26	9	6	0	3	4	5	3	2	0	0	0	0	1	4	1	1	0	0	1	1	2	1	1	0	0	0	0	0	0	0	0	0	0	0	0	0	0	0	0	0	0	9	3	3
265	East Arnhem	ABC remote	male	25	7	6	0	1	4	3	3	1	1	0	0	0	1	1	0	1	0	0	0	0	1	1	0	0	0	0	0	2	1	1	0	0	0	0	0	0	0	0	0	0	0	7	4	1.75
269	East Arnhem	ABC urban	male	26	5	4	1	0	3	2	2	0	2	0	0	0	0	3	1	1	1	0	0	0	0	0	0	0	0	0	0	0	0	0	0	0	0	0	0	0	0	0	0	0	0	5	2	2.5
271	Victoria Daly	ABC remote	female	25	12	8	3	1	5	7	4	2	0	1	0	1	0	4	0	2	0	2	0	0	4	3	1	0	0	0	0	0	0	0	0	0	0	0	0	0	0	0	0	0	0	12	3	4
273	East Arnhem	ABC remote	female	25	7	4	2	1	4	3	3	1	1	0	0	0	1	4	1	1	1	1	0	0	0	0	0	0	0	0	0	0	0	0	0	0	0	0	0	0	0	0	0	0	0	7	2	3.5
276	East Arnhem	ABC remote	male	25	5	5	0	0	4	1	2	1	1	0	0	0	0	1	0	1	0	0	0	0	1	0	1	0	0	0	0	1	0	1	0	0	0	0	0	0	0	0	0	0	0	5	4	1.25
279	East Arnhem	ABC remote	female	25	4	2	2	0	2	2	4	1	1	1	1	0	0	0	0	0	0	0	0	0	0	0	0	0	0	0	0	0	0	0	0	0	0	0	0	0	0	0	0	0	0	4	1	4
284	Tiwi Islands	ABC remote	female	26	2	2	0	0	1	1	2	1	1	0	0	0	0	0	0	0	0	0	0	0	0	0	0	0	0	0	0	0	0	0	0	0	0	0	0	0	0	0	0	0	0	2	1	2
286	Darwin	ABC urban	male	25	4	4	0	0	3	1	1	0	1	0	0	0	0	2	1	1	0	0	0	0	1	0	1	0	0	0	0	0	0	0	0	0	0	0	0	0	0	0	0	0	0	4	3	1.33
288	East Arnhem	ABC remote	female	26	13	11	1	1	6	7	4	2	0	2	0	0	0	2	1	1	0	0	0	0	4	1	3	0	0	0	0	3	1	0	0	1	0	1	0	0	0	0	0	0	0	13	4	3.25
289	Tiwi Islands	ABC remote	male	26	4	3	1	0	3	1	1	0	1	0	0	0	0	2	1	1	0	0	0	0	1	0	0	0	1	0	0	0	0	0	0	0	0	0	0	0	0	0	0	0	0	4	3	1.33
293	East Arnhem	ABC remote	male	25	12	7	5	0	6	6	4	1	1	1	1	0	0	3	1	1	0	1	0	0	2	1	1	0	0	0	0	3	1	0	1	1	0	0	0	0	0	0	0	0	0	12	4	3
296	Katherine	ABC urban	male	26	8	4	2	2	5	3	4	1	1	1	0	0	1	1	0	0	0	1	0	0	3	1	1	0	0	0	1	0	0	0	0	0	0	0	0	0	0	0	0	0	0	8	3	2.67
297	East Arnhem	ABC remote	female	25	7	3	4	0	2	5	5	1	1	3	0	0	0	2	1	0	0	1	0	0	0	0	0	0	0	0	0	0	0	0	0	0	0	0	0	0	0	0	0	0	0	7	2	3.5
311	East Arnhem	ABC remote	female	25	4	2	2	0	3	1	4	1	1	0	2	0	0	0	0	0	0	0	0	0	0	0	0	0	0	0	0	0	0	0	0	0	0	0	0	0	0	0	0	0	0	4	1	4
313	Victoria Daly	ABC remote	female	26	10	9	1	0	4	6	3	2	0	1	0	0	0	2	1	1	0	0	0	0	2	2	0	0	0	0	0	3	0	3	0	0	0	0	0	0	0	0	0	0	0	10	4	2.5
321	Victoria Daly	ABC remote	female	25	8	6	1	1	6	2	3	1	0	0	1	0	1	2	1	1	0	0	0	0	2	0	2	0	0	0	0	1	0	1	0	0	0	0	0	0	0	0	0	0	0	8	4	2
324	East Arnhem	ABC remote	male	25	9	8	0	1	5	4	3	1	1	0	0	0	1	2	1	1	0	0	0	0	2	0	2	0	0	0	0	2	2	0	0	0	0	0	0	0	0	0	0	0	0	9	4	2.25
326	East Arnhem	ABC remote	male	25	6	6	0	0	6	0	1	0	1	0	0	0	0	3	0	3	0	0	0	0	2	0	2	0	0	0	0	0	0	0	0	0	0	0	0	0	0	0	0	0	0	6	3	2
329	Victoria Daly	ABC remote	female	25	3	2	0	1	2	1	3	1	1	0	0	0	1	0	0	0	0	0	0	0	0	0	0	0	0	0	0	0	0	0	0	0	0	0	0	0	0	0	0	0	0	3	1	3
331	Victoria Daly	ABC remote	male	25	8	5	2	1	4	4	5	1	1	1	1	1	0	1	0	1	0	0	0	0	1	1	0	0	0	0	0	1	0	1	0	0	0	0	0	0	0	0	0	0	0	8	4	2
333	Darwin	ABC urban	female	25	5	3	2	0	2	3	4	1	1	1	1	0	0	1	1	0	0	0	0	0	0	0	0	0	0	0	0	0	0	0	0	0	0	0	0	0	0	0	0	0	0	5	2	2.5
335	Darwin	ABC urban	female	25	3	3	0	0	0	3	3	3	0	0	0	0	0	0	0	0	0	0	0	0	0	0	0	0	0	0	0	0	0	0	0	0	0	0	0	0	0	0	0	0	0	3	1	3
338	Tiwi Islands	ABC remote	male	25	5	3	2	0	3	2	1	0	1	0	0	0	0	3	1	1	1	0	0	0	1	0	0	0	1	0	0	0	0	0	0	0	0	0	0	0	0	0	0	0	0	5	3	1.67
345	Victoria Daly	ABC remote	male	26	11	6	3	2	4	7	4	1	1	0	0	1	1	5	1	1	2	1	0	0	2	2	0	0	0	0	0	0	0	0	0	0	0	0	0	0	0	0	0	0	0	11	3	3.67
349	Darwin	ABC urban	female	25	2	2	0	0	0	2	2	2	0	0	0	0	0	0	0	0	0	0	0	0	0	0	0	0	0	0	0	0	0	0	0	0	0	0	0	0	0	0	0	0	0	2	1	2
354	East Arnhem	ABC remote	male	25	13	9	3	1	8	5	4	1	1	0	2	0	0	2	1	1	0	0	0	0	4	1	1	0	1	1	0	3	1	2	0	0	0	0	0	0	0	0	0	0	0	13	4	3.25
356	Victoria Daly	ABC remote	male	25	9	7	1	1	2	7	1	0	1	0	0	0	0	6	4	0	1	0	1	0	2	1	1	0	0	0	0	0	0	0	0	0	0	0	0	0	0	0	0	0	0	9	3	3
357	Victoria Daly	ABC remote	female	25	5	3	2	0	3	2	1	1	0	0	0	0	0	2	1	1	0	0	0	0	2	0	0	0	2	0	0	0	0	0	0	0	0	0	0	0	0	0	0	0	0	5	3	1.67
362	East Arnhem	ABC remote	female	25	6	3	3	0	3	3	4	1	1	1	1	0	0	0	0	0	0	0	0	0	2	1	0	0	1	0	0	0	0	0	0	0	0	0	0	0	0	0	0	0	0	6	2	3
366	Victoria Daly	ABC remote	female	25	4	2	0	2	3	1	4	1	1	0	0	0	2	0	0	0	0	0	0	0	0	0	0	0	0	0	0	0	0	0	0	0	0	0	0	0	0	0	0	0	0	4	1	4
372	Victoria Daly	ABC remote	female	26	11	6	5	0	5	6	4	2	0	1	1	0	0	5	1	1	1	2	0	0	2	1	1	0	0	0	0	0	0	0	0	0	0	0	0	0	0	0	0	0	0	11	3	3.67
373	Tiwi Islands	ABC remote	female	25	7	3	4	0	3	4	4	2	0	1	1	0	0	3	0	1	1	1	0	0	0	0	0	0	0	0	0	0	0	0	0	0	0	0	0	0	0	0	0	0	0	7	2	3.5
378	Victoria Daly	ABC remote	male	25	8	4	4	0	4	4	3	1	1	0	1	0	0	2	1	0	0	1	0	0	3	1	0	1	1	0	0	0	0	0	0	0	0	0	0	0	0	0	0	0	0	8	3	2.67
380	Tiwi Islands	ABC remote	female	25	4	2	2	0	2	2	4	1	1	1	1	0	0	0	0	0	0	0	0	0	0	0	0	0	0	0	0	0	0	0	0	0	0	0	0	0	0	0	0	0	0	4	1	4
382	East Arnhem	ABC remote	male	25	9	6	2	1	6	3	3	0	1	0	2	0	0	3	1	1	0	0	1	0	2	1	1	0	0	0	0	1	0	1	0	0	0	0	0	0	0	0	0	0	0	9	4	2.25
389	Palmerston	ABC urban	male	25	3	3	0	0	2	1	1	0	1	0	0	0	0	1	1	0	0	0	0	0	1	0	1	0	0	0	0	0	0	0	0	0	0	0	0	0	0	0	0	0	0	3	3	1
391	Darwin	ABC urban	female	25	1	1	0	0	0	1	1	1	0	0	0	0	0	0	0	0	0	0	0	0	0	0	0	0	0	0	0	0	0	0	0	0	0	0	0	0	0	0	0	0	0	1	1	1
399	East Arnhem	ABC remote	male	25	7	5	2	0	2	5	2	1	1	0	0	0	0	3	2	0	0	1	0	0	2	1	0	1	0	0	0	0	0	0	0	0	0	0	0	0	0	0	0	0	0	7	3	2.33
401	Tiwi Islands	ABC remote	male	25	6	3	2	1	4	2	1	0	1	0	0	0	0	3	0	0	0	2	1	0	2	1	1	0	0	0	0	0	0	0	0	0	0	0	0	0	0	0	0	0	0	6	3	2
402	East Arnhem	ABC remote	female	25	6	4	0	2	2	4	3	1	1	0	0	1	0	3	1	1	0	0	1	0	0	0	0	0	0	0	0	0	0	0	0	0	0	0	0	0	0	0	0	0	0	6	2	3
404	Darwin	ABC urban	male	25	11	10	1	0	7	4	2	0	2	0	0	0	0	5	2	2	0	1	0	0	2	1	1	0	0	0	0	2	1	1	0	0	0	0	0	0	0	0	0	0	0	11	4	2.75
406	East Arnhem	ABC remote	female	25	7	6	1	0	4	3	2	1	1	0	0	0	0	1	0	0	1	0	0	0	2	0	2	0	0	0	0	2	1	1	0	0	0	0	0	0	0	0	0	0	0	7	4	1.75
407	East Arnhem	ABC remote	female	25	10	6	3	1	3	7	3	1	0	1	0	1	0	1	1	0	0	0	0	0	2	1	1	0	0	0	0	4	1	1	1	1	0	0	0	0	0	0	0	0	0	10	4	2.5
408	East Arnhem	ABC remote	male	25	12	7	4	1	8	4	9	2	2	1	3	0	1	3	1	2	0	0	0	0	0	0	0	0	0	0	0	0	0	0	0	0	0	0	0	0	0	0	0	0	0	12	2	6
409	Victoria Daly	ABC remote	female	25	11	6	1	4	9	2	6	1	2	0	1	0	2	1	0	1	0	0	0	0	4	1	1	0	0	0	2	0	0	0	0	0	0	0	0	0	0	0	0	0	0	11	3	3.67
412	East Arnhem	ABC remote	female	26	12	8	4	0	6	6	3	1	1	0	1	0	0	2	0	2	0	0	0	0	2	1	1	0	0	0	0	5	2	0	2	1	0	0	0	0	0	0	0	0	0	12	4	3
414	East Arnhem	ABC remote	female	25	3	2	0	1	0	3	3	2	0	0	0	1	0	0	0	0	0	0	0	0	0	0	0	0	0	0	0	0	0	0	0	0	0	0	0	0	0	0	0	0	0	3	1	3
416	Tiwi Islands	ABC remote	male	25	4	4	0	0	3	1	2	0	2	0	0	0	0	2	1	1	0	0	0	0	0	0	0	0	0	0	0	0	0	0	0	0	0	0	0	0	0	0	0	0	0	4	2	2
417	East Arnhem	ABC remote	female	26	10	6	2	2	5	5	3	1	0	1	0	1	0	1	1	0	0	0	0	0	4	1	1	0	1	0	1	2	0	2	0	0	0	0	0	0	0	0	0	0	0	10	4	2.5
423	MacDonnell	ABC urban	male	26	4	4	0	0	4	0	1	0	1	0	0	0	0	1	0	1	0	0	0	0	1	0	1	0	0	0	0	1	0	1	0	0	0	0	0	0	0	0	0	0	0	4	4	1
424	Victoria Daly	ABC remote	female	25	4	4	0	0	2	2	1	1	0	0	0	0	0	1	0	1	0	0	0	0	2	1	1	0	0	0	0	0	0	0	0	0	0	0	0	0	0	0	0	0	0	4	3	1.33
427	Victoria Daly	ABC remote	female	25	7	5	1	1	4	3	3	1	1	0	0	0	1	3	1	1	1	0	0	0	1	0	1	0	0	0	0	0	0	0	0	0	0	0	0	0	0	0	0	0	0	7	3	2.33
428	Katherine	ABC remote	male	25	5	5	0	0	1	4	2	1	1	0	0	0	0	3	3	0	0	0	0	0	0	0	0	0	0	0	0	0	0	0	0	0	0	0	0	0	0	0	0	0	0	5	2	2.5
432	Victoria Daly	ABC remote	female	25	6	4	1	1	2	4	4	1	1	1	0	1	0	2	1	1	0	0	0	0	0	0	0	0	0	0	0	0	0	0	0	0	0	0	0	0	0	0	0	0	0	6	2	3
433	East Arnhem	ABC remote	male	26	9	7	2	0	4	5	4	1	1	2	0	0	0	2	1	1	0	0	0	0	2	0	2	0	0	0	0	1	1	0	0	0	0	0	0	0	0	0	0	0	0	9	4	2.25
435	East Arnhem	ABC remote	female	25	5	4	1	0	3	2	3	1	1	0	1	0	0	2	1	1	0	0	0	0	0	0	0	0	0	0	0	0	0	0	0	0	0	0	0	0	0	0	0	0	0	5	2	2.5
436	East Arnhem	ABC remote	female	25	8	5	2	1	4	4	3	1	1	0	0	1	0	2	1	1	0	0	0	0	2	0	0	1	1	0	0	1	0	1	0	0	0	0	0	0	0	0	0	0	0	8	4	2
439	Victoria Daly	ABC remote	male	25	21	10	11	0	11	10	2	1	1	0	0	0	0	4	1	1	1	1	0	0	4	2	0	2	0	0	0	6	1	0	2	3	0	0	5	0	3	0	2	0	0	21	5	4.2
441	East Arnhem	ABC remote	female	25	5	4	1	0	1	4	3	3	0	0	0	0	0	2	0	1	1	0	0	0	0	0	0	0	0	0	0	0	0	0	0	0	0	0	0	0	0	0	0	0	0	5	2	2.5
442	Tiwi Islands	ABC remote	female	25	6	2	3	1	5	1	6	1	1	0	3	0	1	0	0	0	0	0	0	0	0	0	0	0	0	0	0	0	0	0	0	0	0	0	0	0	0	0	0	0	0	6	1	6
443	Katherine	ABC remote	female	26	8	4	4	0	4	4	4	2	0	0	2	0	0	4	1	1	1	1	0	0	0	0	0	0	0	0	0	0	0	0	0	0	0	0	0	0	0	0	0	0	0	8	2	4
444	MacDonnell	ABC urban	female	25	9	6	2	1	3	6	3	2	0	0	0	0	1	5	3	0	1	1	0	0	1	0	1	0	0	0	0	0	0	0	0	0	0	0	0	0	0	0	0	0	0	9	3	3
445	Katherine	ABC remote	male	26	11	7	3	1	6	5	3	0	2	0	1	0	0	4	1	0	2	0	0	1	2	1	1	0	0	0	0	2	1	1	0	0	0	0	0	0	0	0	0	0	0	11	4	2.75
447	East Arnhem	ABC remote	male	25	5	5	0	0	3	2	3	0	3	0	0	0	0	2	2	0	0	0	0	0	0	0	0	0	0	0	0	0	0	0	0	0	0	0	0	0	0	0	0	0	0	5	2	2.5
451	Victoria Daly	ABC remote	female	24	4	3	0	1	0	4	1	1	0	0	0	0	0	3	2	0	0	0	1	0	0	0	0	0	0	0	0	0	0	0	0	0	0	0	0	0	0	0	0	0	0	4	2	2
460	East Arnhem	ABC remote	female	25	8	6	1	1	3	5	2	1	1	0	0	0	0	3	1	1	0	0	1	0	3	1	1	1	0	0	0	0	0	0	0	0	0	0	0	0	0	0	0	0	0	8	3	2.67
462	Palmerston	ABC urban	female	25	4	2	2	0	2	2	4	1	1	1	1	0	0	0	0	0	0	0	0	0	0	0	0	0	0	0	0	0	0	0	0	0	0	0	0	0	0	0	0	0	0	4	1	4
465	East Arnhem	ABC remote	female	24	6	3	2	1	1	5	3	1	1	1	0	0	0	0	0	0	0	0	0	0	3	1	0	1	0	1	0	0	0	0	0	0	0	0	0	0	0	0	0	0	0	6	2	3
466	East Arnhem	ABC remote	female	24	14	8	1	5	5	9	3	1	1	0	0	1	0	3	1	1	0	0	0	1	5	1	1	1	0	2	0	3	1	1	0	0	1	0	0	0	0	0	0	0	0	14	4	3.5
467	East Arnhem	ABC remote	female	24	9	7	2	0	4	5	2	1	1	0	0	0	0	2	1	1	0	0	0	0	2	1	0	0	1	0	0	3	1	1	1	0	0	0	0	0	0	0	0	0	0	9	4	2.25
468	Coomalie	ABC urban	male	26	4	2	2	0	2	2	4	1	1	1	1	0	0	0	0	0	0	0	0	0	0	0	0	0	0	0	0	0	0	0	0	0	0	0	0	0	0	0	0	0	0	4	1	4
469	Tiwi Islands	ABC remote	male	25	4	4	0	0	3	1	1	0	1	0	0	0	0	1	0	1	0	0	0	0	1	0	1	0	0	0	0	1	1	0	0	0	0	0	0	0	0	0	0	0	0	4	4	1
470	East Arnhem	ABC remote	male	25	4	4	0	0	3	1	1	0	1	0	0	0	0	1	0	1	0	0	0	0	2	1	1	0	0	0	0	0	0	0	0	0	0	0	0	0	0	0	0	0	0	4	3	1.33
474	Tiwi Islands	ABC remote	female	25	4	3	0	1	2	2	2	1	1	0	0	0	0	2	1	0	0	0	0	1	0	0	0	0	0	0	0	0	0	0	0	0	0	0	0	0	0	0	0	0	0	4	2	2
475	Victoria Daly	ABC remote	male	24	3	2	0	1	2	1	3	1	1	0	0	0	1	0	0	0	0	0	0	0	0	0	0	0	0	0	0	0	0	0	0	0	0	0	0	0	0	0	0	0	0	3	1	3
476	Tiwi Islands	ABC remote	male	25	1	1	0	0	1	0	1	0	1	0	0	0	0	0	0	0	0	0	0	0	0	0	0	0	0	0	0	0	0	0	0	0	0	0	0	0	0	0	0	0	0	1	1	1
480	Victoria Daly	ABC remote	female	24	8	6	0	2	3	5	4	1	1	0	0	1	1	2	2	0	0	0	0	0	1	1	0	0	0	0	0	1	0	1	0	0	0	0	0	0	0	0	0	0	0	8	4	2
481	Victoria Daly	ABC remote	female	24	13	10	2	1	6	7	4	1	1	0	1	0	1	4	2	2	0	0	0	0	3	2	0	1	0	0	0	2	1	1	0	0	0	0	0	0	0	0	0	0	0	13	4	3.25
488	Katherine	ABC remote	male	25	6	5	1	0	2	4	2	1	1	0	0	0	0	2	1	0	1	0	0	0	2	1	1	0	0	0	0	0	0	0	0	0	0	0	0	0	0	0	0	0	0	6	3	2
494	East Arnhem	ABC remote	male	24	3	2	1	0	1	2	3	1	1	1	0	0	0	0	0	0	0	0	0	0	0	0	0	0	0	0	0	0	0	0	0	0	0	0	0	0	0	0	0	0	0	3	1	3
497	MacDonnell	ABC urban	male	25	1	1	0	0	1	0	1	0	1	0	0	0	0	0	0	0	0	0	0	0	0	0	0	0	0	0	0	0	0	0	0	0	0	0	0	0	0	0	0	0	0	1	1	1
498	East Arnhem	ABC remote	female	25	11	6	3	2	7	4	4	1	1	0	1	0	1	4	1	0	1	1	0	1	2	1	1	0	0	0	0	1	0	1	0	0	0	0	0	0	0	0	0	0	0	11	4	2.75
500	Victoria Daly	ABC remote	male	24	4	4	0	0	2	2	1	0	1	0	0	0	0	3	2	1	0	0	0	0	0	0	0	0	0	0	0	0	0	0	0	0	0	0	0	0	0	0	0	0	0	4	2	2
502	Victoria Daly	ABC remote	female	24	1	1	0	0	0	1	1	1	0	0	0	0	0	0	0	0	0	0	0	0	0	0	0	0	0	0	0	0	0	0	0	0	0	0	0	0	0	0	0	0	0	1	1	1
507	East Arnhem	ABC remote	female	24	12	6	6	0	6	6	2	1	1	0	0	0	0	6	0	0	3	3	0	0	2	1	1	0	0	0	0	2	1	1	0	0	0	0	0	0	0	0	0	0	0	12	4	3
510	Katherine	ABC remote	female	25	9	8	0	1	4	5	3	2	1	0	0	0	0	3	2	0	0	0	1	0	3	0	3	0	0	0	0	0	0	0	0	0	0	0	0	0	0	0	0	0	0	9	3	3
512	East Arnhem	ABC remote	male	24	5	5	0	0	5	0	1	0	1	0	0	0	0	1	0	1	0	0	0	0	1	0	1	0	0	0	0	1	0	1	0	0	0	0	1	0	1	0	0	0	0	5	5	1
513	Katherine	ABC remote	male	25	7	6	1	0	4	3	3	1	1	0	1	0	0	2	1	1	0	0	0	0	2	1	1	0	0	0	0	0	0	0	0	0	0	0	0	0	0	0	0	0	0	7	3	2.33
514	East Arnhem	ABC remote	male	25	6	5	0	1	3	3	2	1	1	0	0	0	0	1	0	1	0	0	0	0	3	1	1	0	0	1	0	0	0	0	0	0	0	0	0	0	0	0	0	0	0	6	3	2
518	Victoria Daly	ABC remote	male	24	6	4	2	0	3	3	1	0	1	0	0	0	0	3	1	0	1	1	0	0	2	1	1	0	0	0	0	0	0	0	0	0	0	0	0	0	0	0	0	0	0	6	3	2
520	Central Dessert	ABC urban	female	24	3	2	1	0	2	1	2	1	1	0	0	0	0	1	0	0	0	1	0	0	0	0	0	0	0	0	0	0	0	0	0	0	0	0	0	0	0	0	0	0	0	3	2	1.5
521	Tiwi Islands	ABC remote	male	24	2	2	0	0	2	0	1	0	1	0	0	0	0	1	0	1	0	0	0	0	0	0	0	0	0	0	0	0	0	0	0	0	0	0	0	0	0	0	0	0	0	2	2	1
525	Katherine	ABC remote	male	25	5	2	2	1	2	3	5	1	1	1	1	1	0	0	0	0	0	0	0	0	0	0	0	0	0	0	0	0	0	0	0	0	0	0	0	0	0	0	0	0	0	5	1	5
526	Darwin	ABC urban	female	24	2	2	0	0	1	1	2	1	1	0	0	0	0	0	0	0	0	0	0	0	0	0	0	0	0	0	0	0	0	0	0	0	0	0	0	0	0	0	0	0	0	2	1	2
528	East Arnhem	ABC remote	female	24	10	4	6	0	4	6	5	2	0	2	1	0	0	5	1	1	1	2	0	0	0	0	0	0	0	0	0	0	0	0	0	0	0	0	0	0	0	0	0	0	0	10	2	5
529	East Arnhem	ABC remote	female	24	9	5	4	0	6	3	6	1	1	0	4	0	0	1	1	0	0	0	0	0	2	1	1	0	0	0	0	0	0	0	0	0	0	0	0	0	0	0	0	0	0	9	3	3
531	Tiwi Islands	ABC remote	female	24	4	4	0	0	2	2	2	1	1	0	0	0	0	2	1	1	0	0	0	0	0	0	0	0	0	0	0	0	0	0	0	0	0	0	0	0	0	0	0	0	0	4	2	2
536	East Arnhem	ABC remote	male	25	6	4	1	1	3	3	3	1	1	0	1	0	0	3	1	1	0	0	1	0	0	0	0	0	0	0	0	0	0	0	0	0	0	0	0	0	0	0	0	0	0	6	2	3
540	East Arnhem	ABC remote	female	24	5	4	0	1	1	4	1	1	0	0	0	0	0	3	2	0	0	0	1	0	1	0	1	0	0	0	0	0	0	0	0	0	0	0	0	0	0	0	0	0	0	5	3	1.67
542	East Arnhem	ABC remote	male	25	3	3	0	0	1	2	2	1	1	0	0	0	0	1	1	0	0	0	0	0	0	0	0	0	0	0	0	0	0	0	0	0	0	0	0	0	0	0	0	0	0	3	2	1.5
545	East Arnhem	ABC remote	female	24	6	4	2	0	3	3	2	1	0	0	1	0	0	4	2	1	0	1	0	0	0	0	0	0	0	0	0	0	0	0	0	0	0	0	0	0	0	0	0	0	0	6	2	3
547	Victoria Daly	ABC remote	female	24	8	5	3	0	3	5	3	1	1	1	0	0	0	2	0	0	1	1	0	0	3	2	1	0	0	0	0	0	0	0	0	0	0	0	0	0	0	0	0	0	0	8	3	2.67
552	Victoria Daly	ABC remote	female	24	12	5	6	1	6	6	7	1	0	3	2	0	1	2	0	2	0	0	0	0	3	1	1	1	0	0	0	0	0	0	0	0	0	0	0	0	0	0	0	0	0	12	3	4
553	East Arnhem	ABC remote	male	24	8	7	1	0	5	3	1	0	1	0	0	0	0	2	1	1	0	0	0	0	2	1	1	0	0	0	0	3	1	1	0	1	0	0	0	0	0	0	0	0	0	8	4	2
555	Palmerston	ABC urban	male	24	4	4	0	0	3	1	2	1	1	0	0	0	0	1	0	1	0	0	0	0	1	0	1	0	0	0	0	0	0	0	0	0	0	0	0	0	0	0	0	0	0	4	3	1.33
556	Victoria Daly	ABC remote	female	24	5	3	1	1	0	5	3	1	0	1	0	1	0	2	2	0	0	0	0	0	0	0	0	0	0	0	0	0	0	0	0	0	0	0	0	0	0	0	0	0	0	5	2	2.5
559	East Arnhem	ABC remote	female	25	5	4	0	1	2	3	3	1	1	0	0	1	0	2	1	1	0	0	0	0	0	0	0	0	0	0	0	0	0	0	0	0	0	0	0	0	0	0	0	0	0	5	2	2.5
560	Tiwi Islands	ABC remote	female	24	4	4	0	0	0	4	4	4	0	0	0	0	0	0	0	0	0	0	0	0	0	0	0	0	0	0	0	0	0	0	0	0	0	0	0	0	0	0	0	0	0	4	1	4
562	East Arnhem	ABC urban	male	24	4	4	0	0	2	2	2	1	1	0	0	0	0	2	1	1	0	0	0	0	0	0	0	0	0	0	0	0	0	0	0	0	0	0	0	0	0	0	0	0	0	4	2	2
563	East Arnhem	ABC remote	female	24	14	9	5	0	7	7	3	1	1	1	0	0	0	2	1	1	0	0	0	0	4	1	1	1	1	0	0	4	1	1	0	2	0	0	1	1	0	0	0	0	0	14	5	2.8
568	East Arnhem	ABC remote	female	23	8	5	2	1	4	4	5	2	2	1	0	0	0	3	0	1	0	1	1	0	0	0	0	0	0	0	0	0	0	0	0	0	0	0	0	0	0	0	0	0	0	8	2	4
570	Victoria Daly	ABC remote	male	25	5	2	1	2	4	1	5	1	1	0	1	0	2	0	0	0	0	0	0	0	0	0	0	0	0	0	0	0	0	0	0	0	0	0	0	0	0	0	0	0	0	5	1	5
572	Darwin	ABC urban	female	24	3	2	1	0	0	3	3	2	0	1	0	0	0	0	0	0	0	0	0	0	0	0	0	0	0	0	0	0	0	0	0	0	0	0	0	0	0	0	0	0	0	3	1	3
576	Katherine	ABC urban	female	25	8	5	1	2	5	3	3	1	1	0	0	0	1	1	0	1	0	0	0	0	4	1	1	1	0	0	1	0	0	0	0	0	0	0	0	0	0	0	0	0	0	8	3	2.67
577	Victoria Daly	ABC remote	female	24	5	2	2	1	4	1	5	1	1	0	2	0	1	0	0	0	0	0	0	0	0	0	0	0	0	0	0	0	0	0	0	0	0	0	0	0	0	0	0	0	0	5	1	5
581	East Arnhem	ABC remote	female	24	12	8	4	0	3	9	6	4	0	2	0	0	0	2	0	1	1	0	0	0	2	0	1	1	0	0	0	2	1	1	0	0	0	0	0	0	0	0	0	0	0	12	4	3
582	Tiwi Islands	ABC remote	male	24	6	5	1	0	3	3	2	1	1	0	0	0	0	2	1	1	0	0	0	0	2	1	0	0	1	0	0	0	0	0	0	0	0	0	0	0	0	0	0	0	0	6	3	2
586	East Arnhem	ABC remote	female	23	5	5	0	0	2	3	2	1	1	0	0	0	0	2	1	1	0	0	0	0	1	1	0	0	0	0	0	0	0	0	0	0	0	0	0	0	0	0	0	0	0	5	3	1.67
587	East Arnhem	ABC remote	male	24	8	6	1	1	6	2	4	1	1	0	1	0	1	1	1	0	0	0	0	0	1	0	1	0	0	0	0	2	0	2	0	0	0	0	0	0	0	0	0	0	0	8	4	2
588	Tiwi Islands	ABC remote	male	24	2	2	0	0	1	1	1	0	1	0	0	0	0	1	1	0	0	0	0	0	0	0	0	0	0	0	0	0	0	0	0	0	0	0	0	0	0	0	0	0	0	2	2	1
593	East Arnhem	ABC remote	male	25	4	4	0	0	3	1	2	1	1	0	0	0	0	1	0	1	0	0	0	0	1	0	1	0	0	0	0	0	0	0	0	0	0	0	0	0	0	0	0	0	0	4	3	1.33
594	Victoria Daly	ABC remote	female	24	7	5	2	0	1	6	1	1	0	0	0	0	0	2	2	0	0	0	0	0	1	0	1	0	0	0	0	3	1	0	2	0	0	0	0	0	0	0	0	0	0	7	4	1.75
595	Victoria Daly	ABC remote	female	24	10	4	4	2	6	4	4	1	1	0	0	0	2	6	1	1	2	2	0	0	0	0	0	0	0	0	0	0	0	0	0	0	0	0	0	0	0	0	0	0	0	10	2	5
596	East Arnhem	ABC remote	female	23	10	8	2	0	6	4	4	1	1	1	1	0	0	2	1	1	0	0	0	0	1	0	1	0	0	0	0	1	0	1	0	0	0	0	2	1	1	0	0	0	0	10	5	2
603	Victoria Daly	ABC remote	male	23	13	5	4	4	10	3	2	1	1	0	0	0	0	6	0	2	0	2	0	2	5	0	1	0	2	2	0	0	0	0	0	0	0	0	0	0	0	0	0	0	0	13	3	4.33
605	Victoria Daly	ABC remote	female	24	6	2	3	1	4	2	6	1	1	1	2	0	1	0	0	0	0	0	0	0	0	0	0	0	0	0	0	0	0	0	0	0	0	0	0	0	0	0	0	0	0	6	1	6
610	Darwin	ABC urban	female	24	6	3	2	1	4	2	4	1	1	1	0	0	1	2	0	1	0	1	0	0	0	0	0	0	0	0	0	0	0	0	0	0	0	0	0	0	0	0	0	0	0	6	2	3
613	Victoria Daly	ABC remote	male	24	9	4	4	1	5	4	2	1	1	0	0	0	0	7	1	1	1	3	1	0	0	0	0	0	0	0	0	0	0	0	0	0	0	0	0	0	0	0	0	0	0	9	2	4.5
617	East Arnhem	ABC remote	female	23	5	3	2	0	2	3	2	1	1	0	0	0	0	3	1	0	1	1	0	0	0	0	0	0	0	0	0	0	0	0	0	0	0	0	0	0	0	0	0	0	0	5	2	2.5
618	Tiwi Islands	ABC remote	male	24	7	5	2	0	3	4	4	1	1	1	1	0	0	3	2	1	0	0	0	0	0	0	0	0	0	0	0	0	0	0	0	0	0	0	0	0	0	0	0	0	0	7	2	3.5
619	Tiwi Islands	ABC remote	female	24	5	3	2	0	3	2	1	1	0	0	0	0	0	4	1	1	0	2	0	0	0	0	0	0	0	0	0	0	0	0	0	0	0	0	0	0	0	0	0	0	0	5	2	2.5
622	Victoria Daly	ABC remote	male	24	4	4	0	0	2	2	1	0	1	0	0	0	0	2	1	1	0	0	0	0	1	1	0	0	0	0	0	0	0	0	0	0	0	0	0	0	0	0	0	0	0	4	3	1.33
624	East Arnhem	ABC remote	female	24	10	9	0	1	4	6	2	1	1	0	0	0	0	3	1	1	0	0	1	0	3	3	0	0	0	0	0	2	0	2	0	0	0	0	0	0	0	0	0	0	0	10	4	2.5
628	East Arnhem	ABC remote	male	23	9	5	4	0	5	4	3	1	1	0	1	0	0	2	0	1	1	0	0	0	4	1	1	1	1	0	0	0	0	0	0	0	0	0	0	0	0	0	0	0	0	9	3	3
629	Victoria Daly	ABC remote	female	23	23	10	8	5	11	12	4	4	0	0	0	0	0	8	1	0	2	2	2	1	7	1	1	2	1	0	2	4	0	3	0	1	0	0	0	0	0	0	0	0	0	23	4	5.75
631	Katherine	ABC remote	female	24	5	3	2	0	2	3	1	1	0	0	0	0	0	0	0	0	0	0	0	0	4	1	1	1	1	0	0	0	0	0	0	0	0	0	0	0	0	0	0	0	0	5	2	2.5
635	East Arnhem	ABC remote	female	23	5	4	1	0	2	3	5	3	1	0	1	0	0	0	0	0	0	0	0	0	0	0	0	0	0	0	0	0	0	0	0	0	0	0	0	0	0	0	0	0	0	5	1	5
637	Tiwi Islands	ABC remote	female	24	4	4	0	0	2	2	2	1	1	0	0	0	0	2	1	1	0	0	0	0	0	0	0	0	0	0	0	0	0	0	0	0	0	0	0	0	0	0	0	0	0	4	2	2
641	East Arnhem	ABC remote	female	23	14	6	7	1	7	7	2	1	0	0	0	1	0	5	1	1	2	1	0	0	1	0	1	0	0	0	0	6	1	1	1	3	0	0	0	0	0	0	0	0	0	14	4	3.5
642	Tiwi Islands	ABC remote	female	24	3	2	0	1	2	1	2	1	0	0	0	0	1	1	0	1	0	0	0	0	0	0	0	0	0	0	0	0	0	0	0	0	0	0	0	0	0	0	0	0	0	3	2	1.5
643	East Arnhem	ABC remote	female	23	14	8	1	5	6	8	3	1	0	0	0	2	0	2	1	1	0	0	0	0	3	1	1	0	0	1	0	4	1	1	0	0	0	2	2	0	1	1	0	0	0	14	5	2.8
644	East Arnhem	ABC remote	male	23	7	4	3	0	3	4	4	1	1	2	0	0	0	3	1	1	0	1	0	0	0	0	0	0	0	0	0	0	0	0	0	0	0	0	0	0	0	0	0	0	0	7	2	3.5
645	East Arnhem	ABC urban	female	24	8	5	0	3	3	5	4	1	1	0	0	1	1	4	3	0	0	0	0	1	0	0	0	0	0	0	0	0	0	0	0	0	0	0	0	0	0	0	0	0	0	8	2	4
647	East Arnhem	ABC remote	male	23	10	4	6	0	1	9	3	0	1	2	0	0	0	5	3	0	2	0	0	0	2	0	0	2	0	0	0	0	0	0	0	0	0	0	0	0	0	0	0	0	0	10	3	3.33
654	Victoria Daly	ABC remote	male	24	7	5	1	1	4	3	1	0	1	0	0	0	0	3	1	1	0	0	1	0	3	1	1	0	1	0	0	0	0	0	0	0	0	0	0	0	0	0	0	0	0	7	3	2.33
662	East Arnhem	ABC urban	male	24	5	4	1	0	3	2	2	0	2	0	0	0	0	3	1	1	1	0	0	0	0	0	0	0	0	0	0	0	0	0	0	0	0	0	0	0	0	0	0	0	0	5	2	2.5
666	East Arnhem	ABC remote	male	23	12	8	4	0	5	7	2	1	1	0	0	0	0	4	1	1	2	0	0	0	4	1	1	1	1	0	0	2	1	1	0	0	0	0	0	0	0	0	0	0	0	12	4	3
670	East Arnhem	ABC remote	female	23	7	5	1	1	4	3	2	1	1	0	0	0	0	2	1	1	0	0	0	0	1	0	0	0	1	0	0	2	1	0	0	0	1	0	0	0	0	0	0	0	0	7	4	1.75
672	Darwin	ABC urban	male	23	4	3	0	1	3	1	3	1	1	0	0	0	1	1	0	1	0	0	0	0	0	0	0	0	0	0	0	0	0	0	0	0	0	0	0	0	0	0	0	0	0	4	2	2
674	Katherine	ABC urban	male	24	3	2	0	1	2	1	3	1	1	0	0	0	1	0	0	0	0	0	0	0	0	0	0	0	0	0	0	0	0	0	0	0	0	0	0	0	0	0	0	0	0	3	1	3
677	Victoria Daly	ABC remote	female	23	13	7	4	2	5	8	3	1	0	0	0	2	0	3	1	1	0	1	0	0	2	1	1	0	0	0	0	5	1	1	2	1	0	0	0	0	0	0	0	0	0	13	4	3.25
679	Victoria Daly	ABC remote	male	24	8	4	1	3	5	3	4	1	1	0	0	0	2	4	1	1	0	1	1	0	0	0	0	0	0	0	0	0	0	0	0	0	0	0	0	0	0	0	0	0	0	8	2	4
681	East Arnhem	ABC remote	female	23	11	8	3	0	6	5	5	3	0	0	2	0	0	1	0	0	0	1	0	0	3	1	2	0	0	0	0	2	1	1	0	0	0	0	0	0	0	0	0	0	0	11	4	2.75
682	Darwin	ABC urban	male	24	3	2	0	1	1	2	3	1	1	0	0	1	0	0	0	0	0	0	0	0	0	0	0	0	0	0	0	0	0	0	0	0	0	0	0	0	0	0	0	0	0	3	1	3
686	Victoria Daly	ABC remote	female	26	11	6	1	4	5	6	4	1	0	1	0	1	1	2	1	1	0	0	0	0	4	1	1	0	0	1	1	1	0	1	0	0	0	0	0	0	0	0	0	0	0	11	4	2.75
687	Darwin	ABC urban	female	24	3	2	0	1	1	2	3	1	1	0	0	1	0	0	0	0	0	0	0	0	0	0	0	0	0	0	0	0	0	0	0	0	0	0	0	0	0	0	0	0	0	3	1	3
